# Supplementary material for: Biallelic mutations in CFAP65 lead to severe asthenoteratospermia due to acrosome hypoplasia and flagellum malformations
Source: PubMed Central journal article supplement — J Med Genet. 2019 Aug 14;56(11):750–7. doi: 10.1136/jmedgenet-2019-106031 (PMC6860412; doi:10.1136/jmedgenet-2019-106031), 2019-08-14
Supplement: jmedgenet-2019-106031supp001.pdf [file jmedgenet-2019-106031supp001.pdf]

## Supplemental Data

Table S1. All antibodies used in the study

| Antigen            | Antibody   | Host species | Source        | Application |
|--------------------|------------|--------------|---------------|-------------|
| CFAP65(CCDC108)    | A58454-050 | Rabbit       | EpiGentek     | IF (1:400)  |
| SPAG6              | HPA038440  | Rabbit       | Sigma-Aldrich | IF (1:400)  |
| Acetylated Tubulin | T7451      | Mouse        | Sigma-Aldrich | IF (1:1000) |
| Alexa Fluor 555    | A-31572    | Donkey       | Invitrogen    | IF (1:400)  |
| Alexa Fluor 488    | A-21121    | Goat         | Invitrogen    | IF (1:400)  |

Table S2. Screening strategy to identify the causal genes by WES

| Screening procedure                                            | F1:II-2 | F2:II-2 | F3:II-1 |
|----------------------------------------------------------------|---------|---------|---------|
| Total variants                                                 | 138,085 | 134,981 | 122642  |
| Filter rare variants (MAF<5%) in public databases <sup>1</sup> | 16631   | 15902   | 14328   |
| Filter variants with functional impact <sup>2</sup>            | 359     | 331     | 291     |
| Homozygous /compound heterozygous variants                     | 18/21   | 17/20   | 11/13   |
| Relevancy for phenotype <sup>3</sup>                           | 2       | 2       | 1       |
| Sanger sequencing/Co-segregation                               | 1       | 1       | 1       |

**Note:** <sup>1</sup> represent the following three databases: dbSNP, 1000 Genomes Project, and ExAC; <sup>2</sup> represent variants predicted to be deleterious; <sup>3</sup> represent variants associated with phenotype, including expression in testis or the existence of a mouse KO model with infertility phenotype.

**Table S3. The list of candidate variants relevant for the phenotype in affected individuals**

| Sample ID | Gene          | RefSeq ID     | Location                  | Amino Acid Alteration    | Min Depth              | Function   | dbSNP ID    | 1000 G      | GO-ESP   | Ex AC      | Co-segregation |
|-----------|---------------|---------------|---------------------------|--------------------------|------------------------|------------|-------------|-------------|----------|------------|----------------|
| F1:II-2   | <i>CFAP65</i> | NM_194302     | Chr2: 219868888           | c.G5341T:p.E1781X        | 101                    | Stopgain   | NA          | NA          | NA       | NA         | Yes            |
|           |               | <i>SLAIN1</i> | NM_001242868              | Chr13: 78272267          | c.219_220insGG:p.A73fs | 50         | Frameshift  | rs201380414 | NA       | NA         | NA             |
| F2:II-2   | <i>CFAP65</i> | NM_194302     | Chr2: 219890809           | c.C2284T:p.R762X         | 107                    | Stopgain   | NA          | NA          | NA       | 0.00001652 | Yes            |
|           |               |               | Chr2: 219892637           | c.1751delC:p.P584fs      | 225                    | Frameshift | NA          | NA          | NA       | NA         | Yes            |
|           |               | <i>TCP11</i>  | NM_001261818              | Chr6: 35086272           | c.G1187A:p.R396Q       | 171        | Missense    | rs2234051   | 0.009984 | 0.0086     | 0.008          |
|           |               |               | Chr6: 35086275            | c.A1184G:p.Q395R         | 228                    | Missense   | rs115171214 | 0.009984    | 0.0085   | 0.0081     | No             |
| F3:II-1   | <i>CFAP65</i> | NM_194302     | Chr2: 219867716-219867723 | c.5714_5721del:p.L1905fs | 305                    | Frameshift | NA          | NA          | NA       | NA         | -              |
|           |               |               | Chr2: 219886611           | c.C3021A:p.N1007K        | 323                    | Missense   | NA          | NA          | NA       | NA         | -              |

**Table S4. Infertility-related examination of the affected individuals**

|                                        | Item <sup>1</sup>        | F1:II-2   | F2:II-2   | F3:II-1 | Normal Value Range        |
|----------------------------------------|--------------------------|-----------|-----------|---------|---------------------------|
| Hormonal profile                       | T                        | 4.55      | 5.32      | 3.76    | 1.42-9.23ng/ml            |
|                                        | FSH                      | 7.21      | 6.29      | 4.97    | 0.95-11.95mIU/ml          |
|                                        | LH                       | 4.98      | 2.86      | 7.21    | 0.57-12.07mIU/ml          |
| Testicular volume                      | Left                     | 14        | 13        | 15      | 10-15ml                   |
|                                        | Right                    | 15        | 13        | 15      | 10-15ml                   |
| Semen routine Examination <sup>2</sup> | Progressive motility (%) | 0         | 0         | 0       |                           |
|                                        | Semen volume             | 3-3.9     | 3.6-3.8   | 2.1-3.3 | >1.5ml                    |
|                                        | Sperm count              | 14.5-15.3 | 11.3-13.4 | 5.3-6.9 | >15×10 <sup>6</sup> (/ml) |

**Note:** <sup>1</sup>T: testosterone; FSH: follicle-stimulating hormone; LH: luteinizing hormone; <sup>2</sup> Semen parameters were evaluated according to the World Health Organization (WHO, 2010) guidelines.

**Table S5. Laboratory testing and outcomes of ICSI in the three couples with *CFAP65* mutations**

|                               | F1:II-2          |         | F2:II-2          |         | F3:II-1          |         |
|-------------------------------|------------------|---------|------------------|---------|------------------|---------|
|                               | Cycle-1          | Cycle-2 | Cycle-1          | Cycle-2 | Cycle-1          | Cycle-2 |
| Female age                    | 25               | 25      | 24               | 24      | 37               | 37      |
| No of oocytes retrieved       | 9                | 15      | 12               | 16      | 13               | 12      |
| MII oocytes                   | 2                | 3       | 5                | 6       | 9                | 5       |
| Sperm origin                  | Ejaculated sperm |         | Ejaculated sperm |         | Ejaculated sperm |         |
| Normal fertilization          | 2                | 3       | 4                | 6       | 9                | 4       |
| Good quality embryos          | 0                | 1       | 2                | 3       | 5                | 3       |
| Number of embryos transferred | 0                | 1       | 2                | 2       | 2                | 1       |
| Number of transfers           | 0                | 1       | 1                | 1       | 2                | 1       |
| Clinical pregnancy            | 0                | 0       | 0                | 0       | 0                | 0       |
| Ongoing pregnancy             | 0                | 0       | 0                | 0       | 0                | 0       |
