# Supplementary figures and images for: Biallelic mutations in CFAP65 lead to severe asthenoteratospermia due to acrosome hypoplasia and flagellum malformations
Source: PubMed Central journal article supplement — J Med Genet. 2019 Aug 14;56(11):750–7. doi: 10.1136/jmedgenet-2019-106031 (PMC6860412; doi:10.1136/jmedgenet-2019-106031), 2019-08-14

**Figure S1.****a**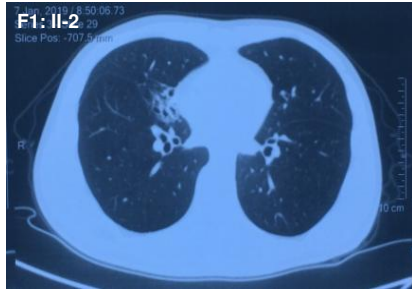**b**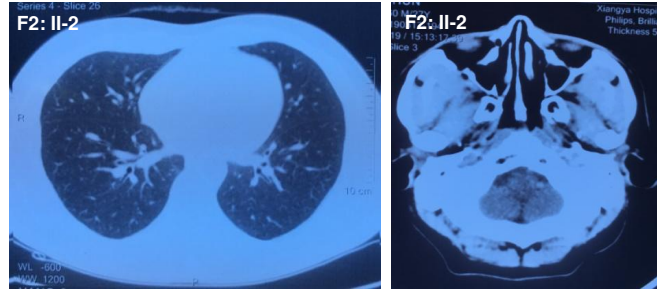

**Figure S2.****a**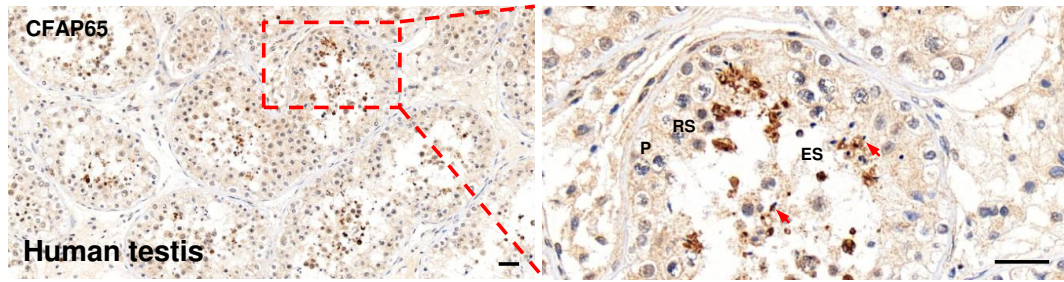**b**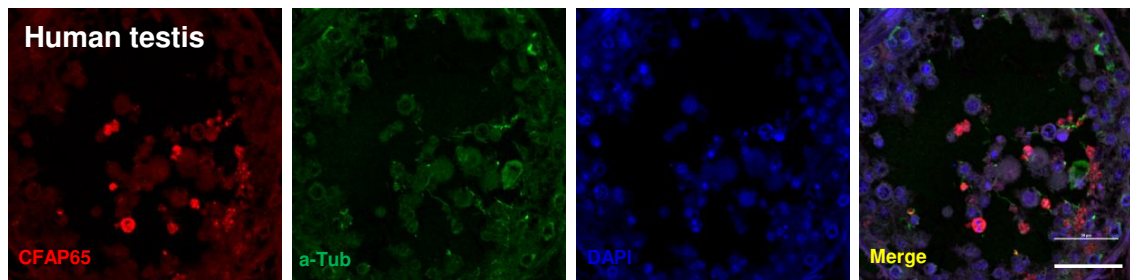

**Figure S3.**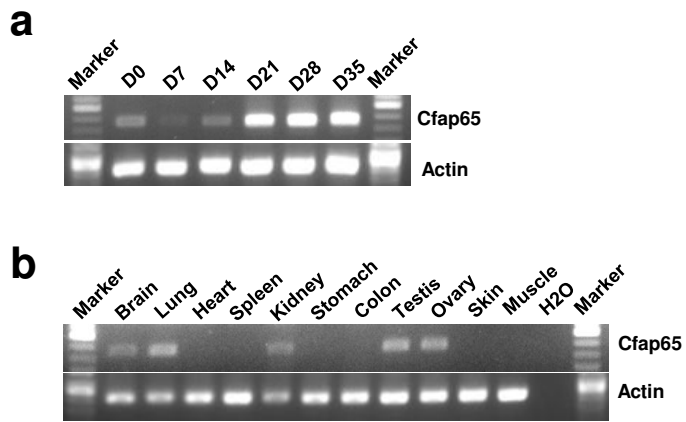

**Figure S4.**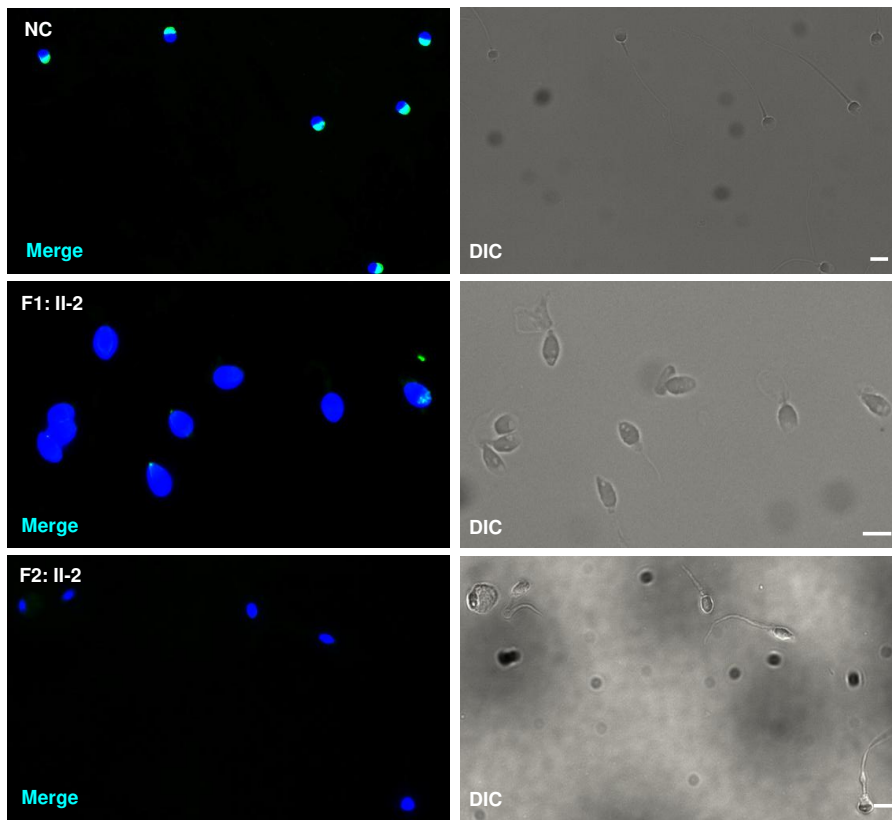

Supplement: jmedgenet-2019-106031supp002.pdf [file jmedgenet-2019-106031supp002.pdf]
